# Supplementary material for: Impact of Guar Gum and Locust Bean Gum Addition on the Pasting, Rheological Properties, and Freeze–Thaw Stability of Rice Starch Gel
Source: MDPI journal article supplement (doi:10.3390/foods11162508), 2022-08-19
Supplement: s1 [file s1]

## SUPPLEMENTARY MATERIALS

**Table S1.** Gelatinization temperature and enthalpy and retrogradation ratio for RS alone, RS containing locust bean gum (RS/LBG) and RS containing guar gum (RS/GG) measured by the differential scanning calorimeter (DSC)

| Samples  | Days | $T_o(^{\circ}\text{C})$ | $T_p(^{\circ}\text{C})$ | $T_c(^{\circ}\text{C})$ | $\Delta H(\text{J/g})$ | (%)   |
|----------|------|-------------------------|-------------------------|-------------------------|------------------------|-------|
| RS alone | 3    | 46.953                  | 54.663                  | 59.432                  | 0.295                  | 11.09 |
|          | 5    | 49.660                  | 55.397                  | 64.258                  | 1.481                  | 55.68 |
|          | 12   | 52.939                  | 57.172                  | 60.098                  | 2.315                  | 87.03 |
| RS/LBG   | 3    | 46.394                  | 52.513                  | 59.998                  | 0.403                  | 14.60 |
|          | 5    | 46.857                  | 57.778                  | 61.299                  | 1.376                  | 49.86 |
|          | 12   | 52.388                  | 57.414                  | 62.614                  | 1.429                  | 51.78 |
| RS/GG    | 3    | 47.731                  | 53.350                  | 63.244                  | 0.329                  | 12.01 |
|          | 5    | 53.103                  | 58.803                  | 63.685                  | 1.105                  | 40.33 |
|          | 12   | 48.540                  | 54.170                  | 63.616                  | 1.468                  | 53.58 |

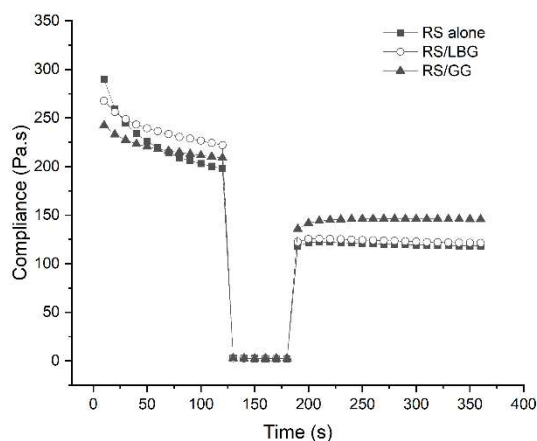

**Figure S1.** The creep-recovery curves of RS alone, RS containing locust bean gum (RS/LBG) and RS containing guar gum (RS/GG).
